# Supplementary material for: Function and Biomarkers of the Blood-Brain Barrier in a Neonatal Germinal Matrix Haemorrhage Model
Source: MDPI journal article supplement (doi:10.3390/cells10071677), 2021-07-02
Supplement: s1 [file s1]

**Table S1.** Average tight-junction concentrations separated for group and sex. OCLN and CLDN5 was measured in the blood and plasma of all animals at 2h, (3m, 4f) 6h (4m, 3f), 24h (3m, 4f), 5d (4m, 3f), 2-24h controls (3m, 3f), and 5d controls (3m, 3f). m = male, f = female.

| [TJ-protein]   | GMH             |                 |         | Controls        |                 |         |
|----------------|-----------------|-----------------|---------|-----------------|-----------------|---------|
|                | Males           | Females         | p-value | Males           | Females         | p-value |
| CLDN5 (plasma) | 17.56 ± 5.26    | 19.49 ± 8.73    | 0.8575  | 15.65 ± 1.41    | 15.03 ± 1.05    | 0.3563  |
| OCLN (plasma)  | 422.56 ± 141.00 | 458.90 ± 130.88 | 0.6739  | 534.24 ± 152.31 | 502.34 ± 116.33 | 0.4100  |
| CLDN5 (CSF)    | 73.87 ± 16.15   | 75.47 ± 15.54   | 0.6761  | 59.31 ± 9.80    | 65.81 ± 10.04   | 0.2063  |
| OCLN (CSF)     | 364.18 ± 185.00 | 349.25 ± 142.70 | 0.3485  | 188.06 ± 39.28  | 202.82 ± 82.40  | 0.5824  |
